# Supplementary material
Source: PubMed Central journal article supplement (PMC4667644)
Supplement: ncomms9728-s1.pdf [file ncomms9728-s1.pdf]

# SUPPLEMENTARY FIGURES

## Supplementary Figure 1

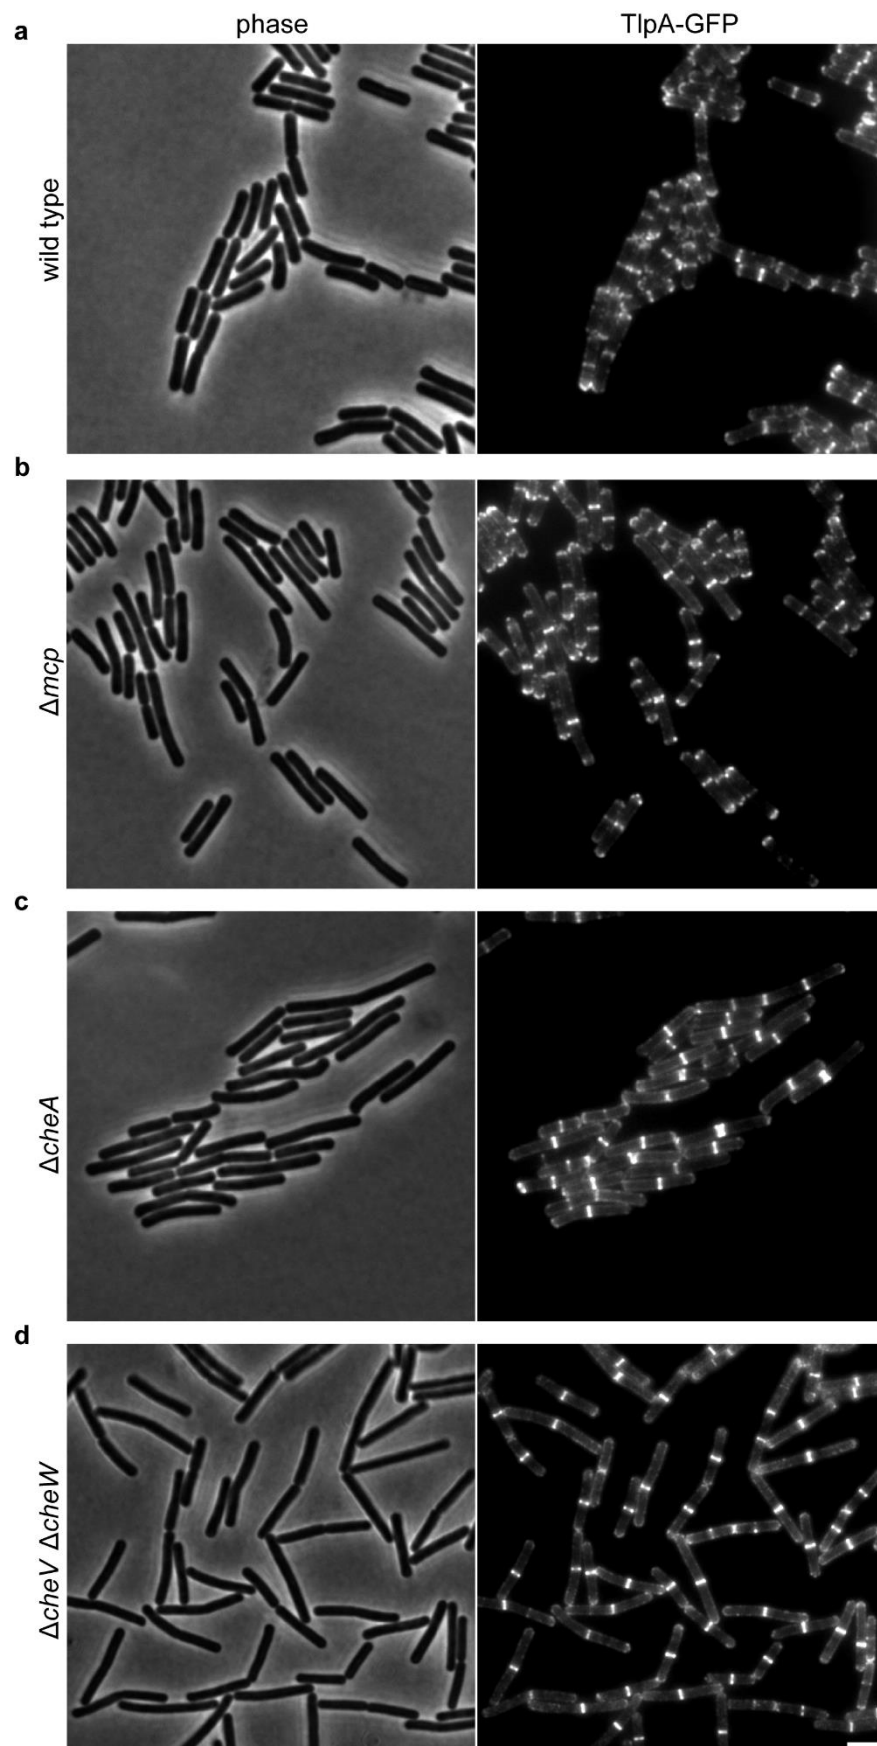

### ***B. subtilis* TlpA localizes at cell poles and cell division sites**

Phase contrast images (left panels) of *B. subtilis* cells expressing TlpA-GFP (right panels) in the presence (a) and absence (b) of other MCPs, and in the absence of CheA (c) or CheV and CheW (d). No difference in recruitment to the cell division sites is observed in the different strain backgrounds. In contrast, the polar localization is reduced in the absence of CheA, or CheV and CheW. Note that *B. subtilis* encodes two CheW-homologs (CheW and CheV). These are larger fields of cells shown in Fig. 1 and Fig. 2d. Strains used: *B. subtilis* HS48 (*P<sub>xyl</sub>-tlpA-gfp*), *B. subtilis* HS49 ( $\Delta$ *mcp P<sub>xyl</sub>-tlpA-gfp*), *B. subtilis* HS53 ( $\Delta$ *cheA P<sub>xyl</sub>-tlpA-gfp*), and *B. subtilis* HS63 ( $\Delta$ *cheV*  $\Delta$ *cheW P<sub>xyl</sub>-tlpA-gfp*). Scale bar, 3  $\mu$ m.

Supplementary Figure 2

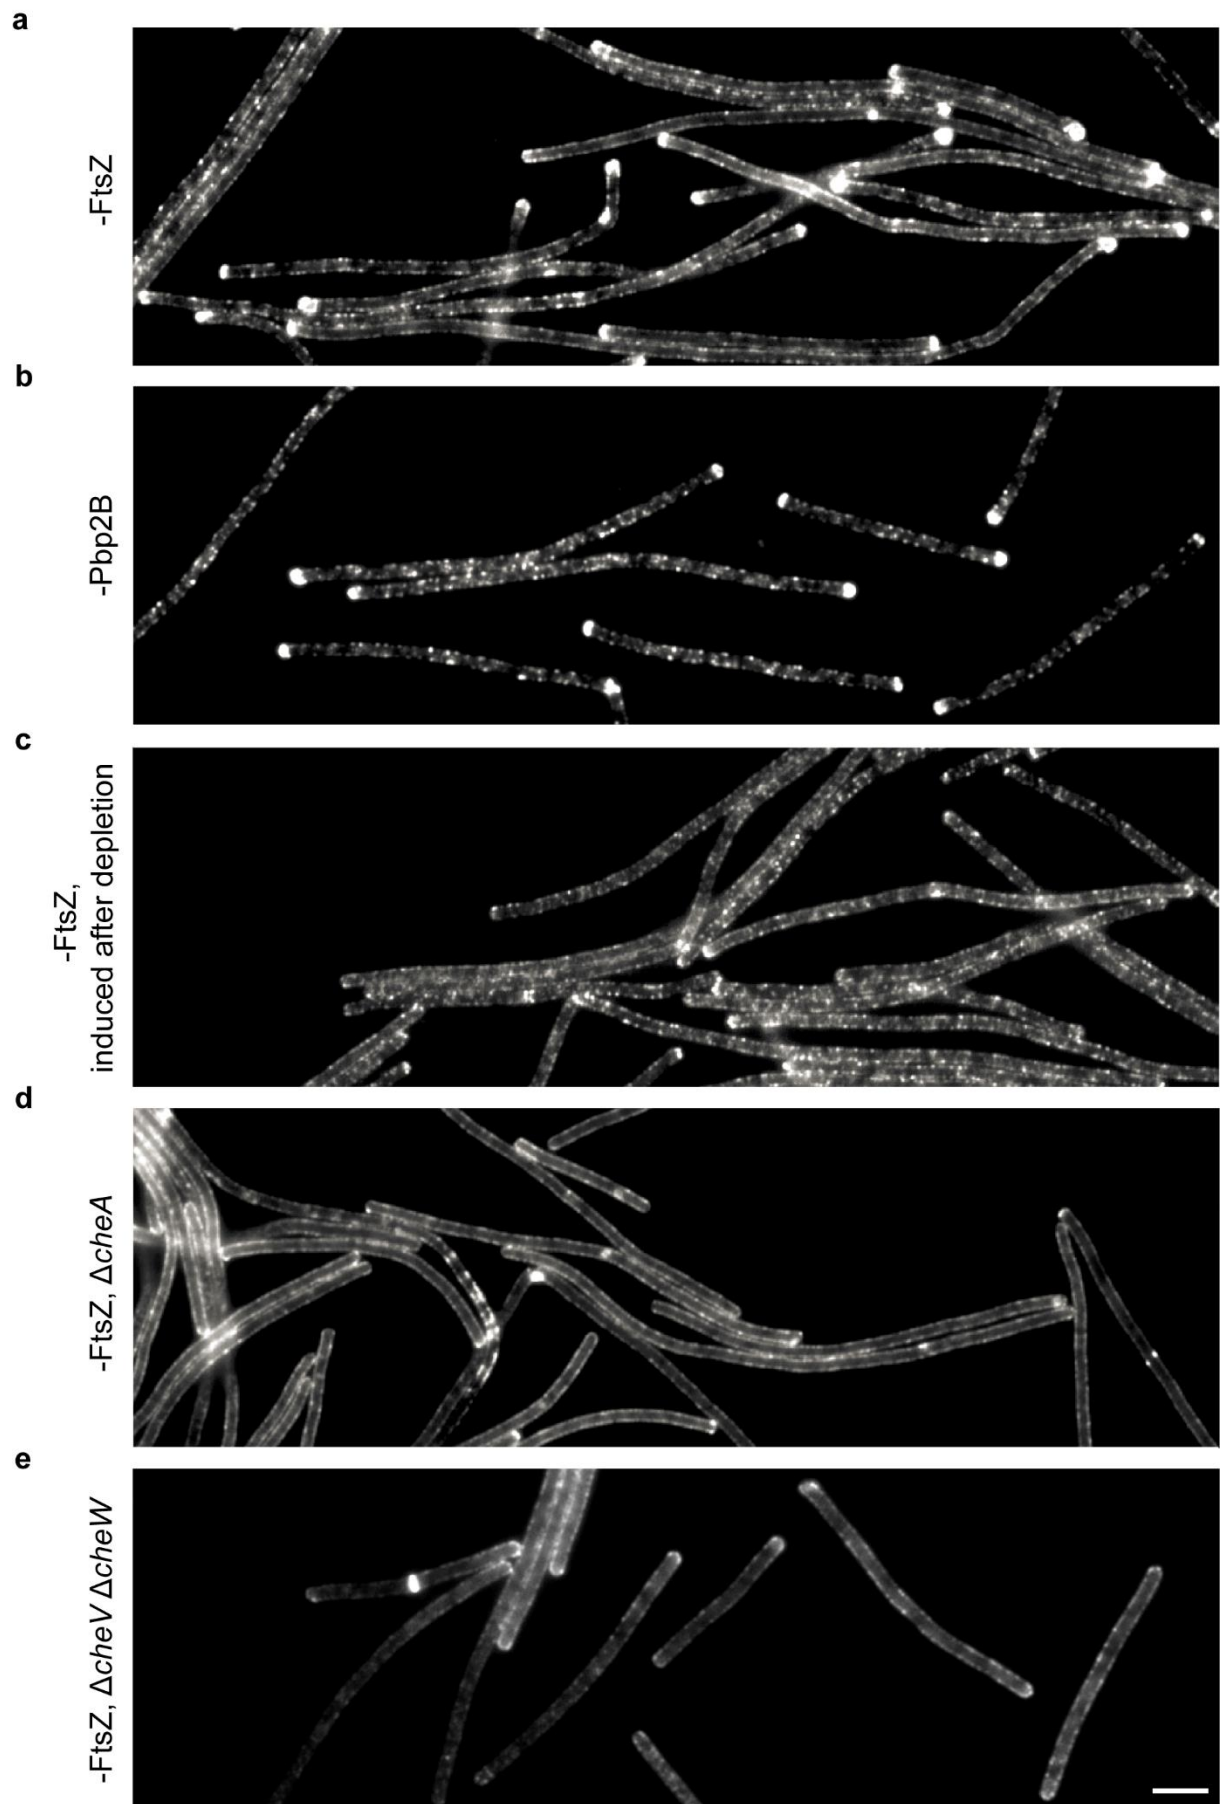

### **TlpA localizes to cell division sites**

(a) Fluorescence images of *B. subtilis* expressing TlpA-GFP in cells depleted for FtsZ, and (b) in cells depleted for Pbp2B in the absence of other MCPs. (c) Localization of TlpA-GFP in cells in which FtsZ was depleted *before* expression of *tlpA-gfp* was induced. (d) Localization of TlpA-GFP in cells depleted for FtsZ in the absence of CheA, and (e) in the absence of CheV and CheW. These are larger fields of cells shown in Fig. 2a, 2b, and 2c. Strains used: *B. subtilis* HS50 ( $\Delta mcp$  *Pxyl-tlpA-gfp Pspac-ftsZ*), *B. subtilis* HS51 ( $\Delta mcp$  *Pxyl-tlpA-gfp Pspac-pbpB*), *B. subtilis* HS54 ( $\Delta cheA$  *Pxyl-tlpA-gfp, Pspac-ftsZ*), and *B. subtilis* HS64 ( $\Delta cheV \Delta cheW$  *Pxyl-tlpA-gfp, Pspac-ftsZ*). Scale bar, 3  $\mu$ m.

### Supplementary Figure 3

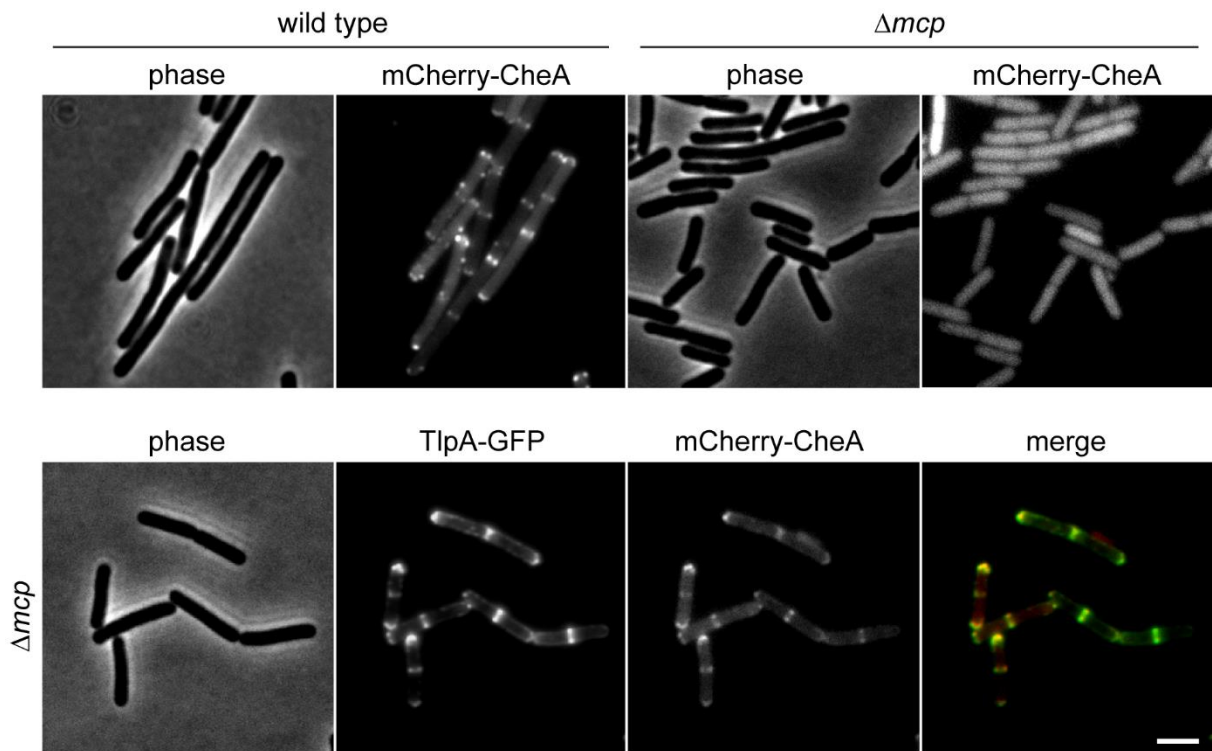

#### Cellular localization of CheA

Cellular localization of mCherry-CheA in wild type cells, in a strain deficient for all 10 native chemoreceptors (upper panels), and in the presence of TlpA-GFP (lower panels). Note that the localization in wild type cells is comparable to that of TlpA and that there is no localization in the absence of chemoreceptors. When only TlpA-GFP is present in the  $\Delta mcp$  background strain, the localization of mCherry-CheA is restored (lower panel). Strains used: *B. subtilis* HS65 (*Pspac-mcherry-cheA*), *B. subtilis* HS66 ( $\Delta mcp$  *Pspac-mcherry-cheA*), and *B. subtilis* HS67 ( $\Delta mcp$  *Pspac-mcherry-cheA P<sub>xyl</sub>-tlpA-gfp*). Scale bar, 3  $\mu$ m.

## Supplementary Figure 4

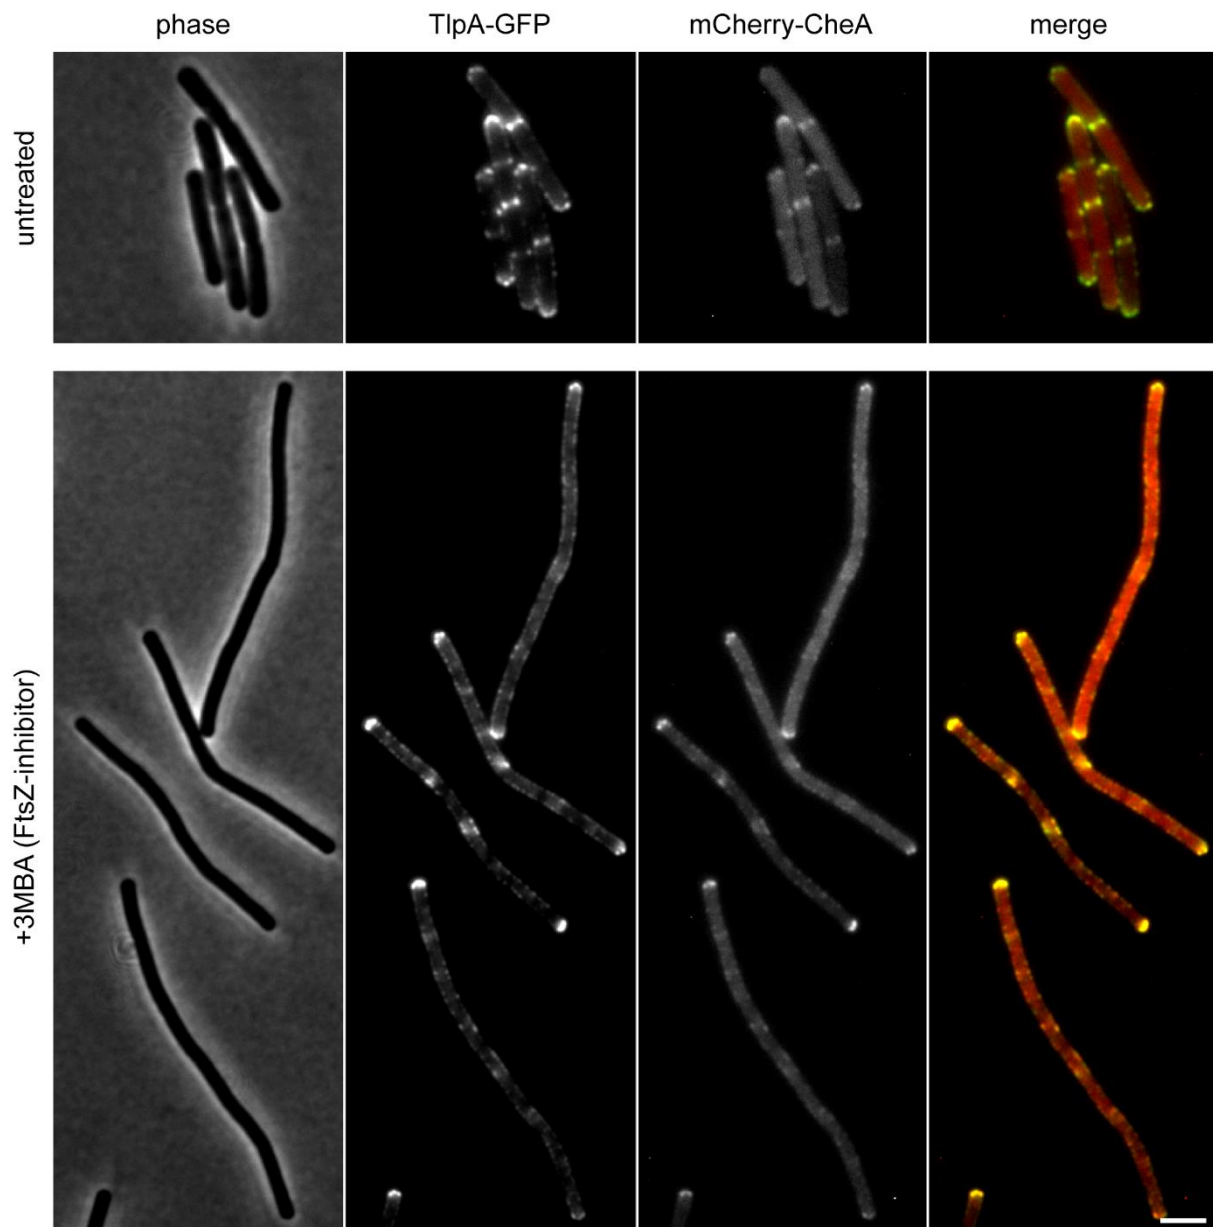

### Colocalization of TlpA and CheA in the presence and absence of cell division

A strain co-expressing TlpA-GFP and mCherry-CheA is depicted in the absence (upper panels) and presence (lower panels) of the FtsZ-inhibitor 3MBA (3-Methoxybenzamide)<sup>1</sup>. There is a clear colocalization of TlpA with CheA both at the cell poles, and in the lateral membranes of the division-inhibited cells. Strain used: *B. subtilis* HS67 ( $\Delta mcp$  *Pspac-mcherry-cheA P<sub>xyl</sub>-tlpA-gfp*). Scale bar, 3  $\mu$ m.

## Supplementary Figure 5

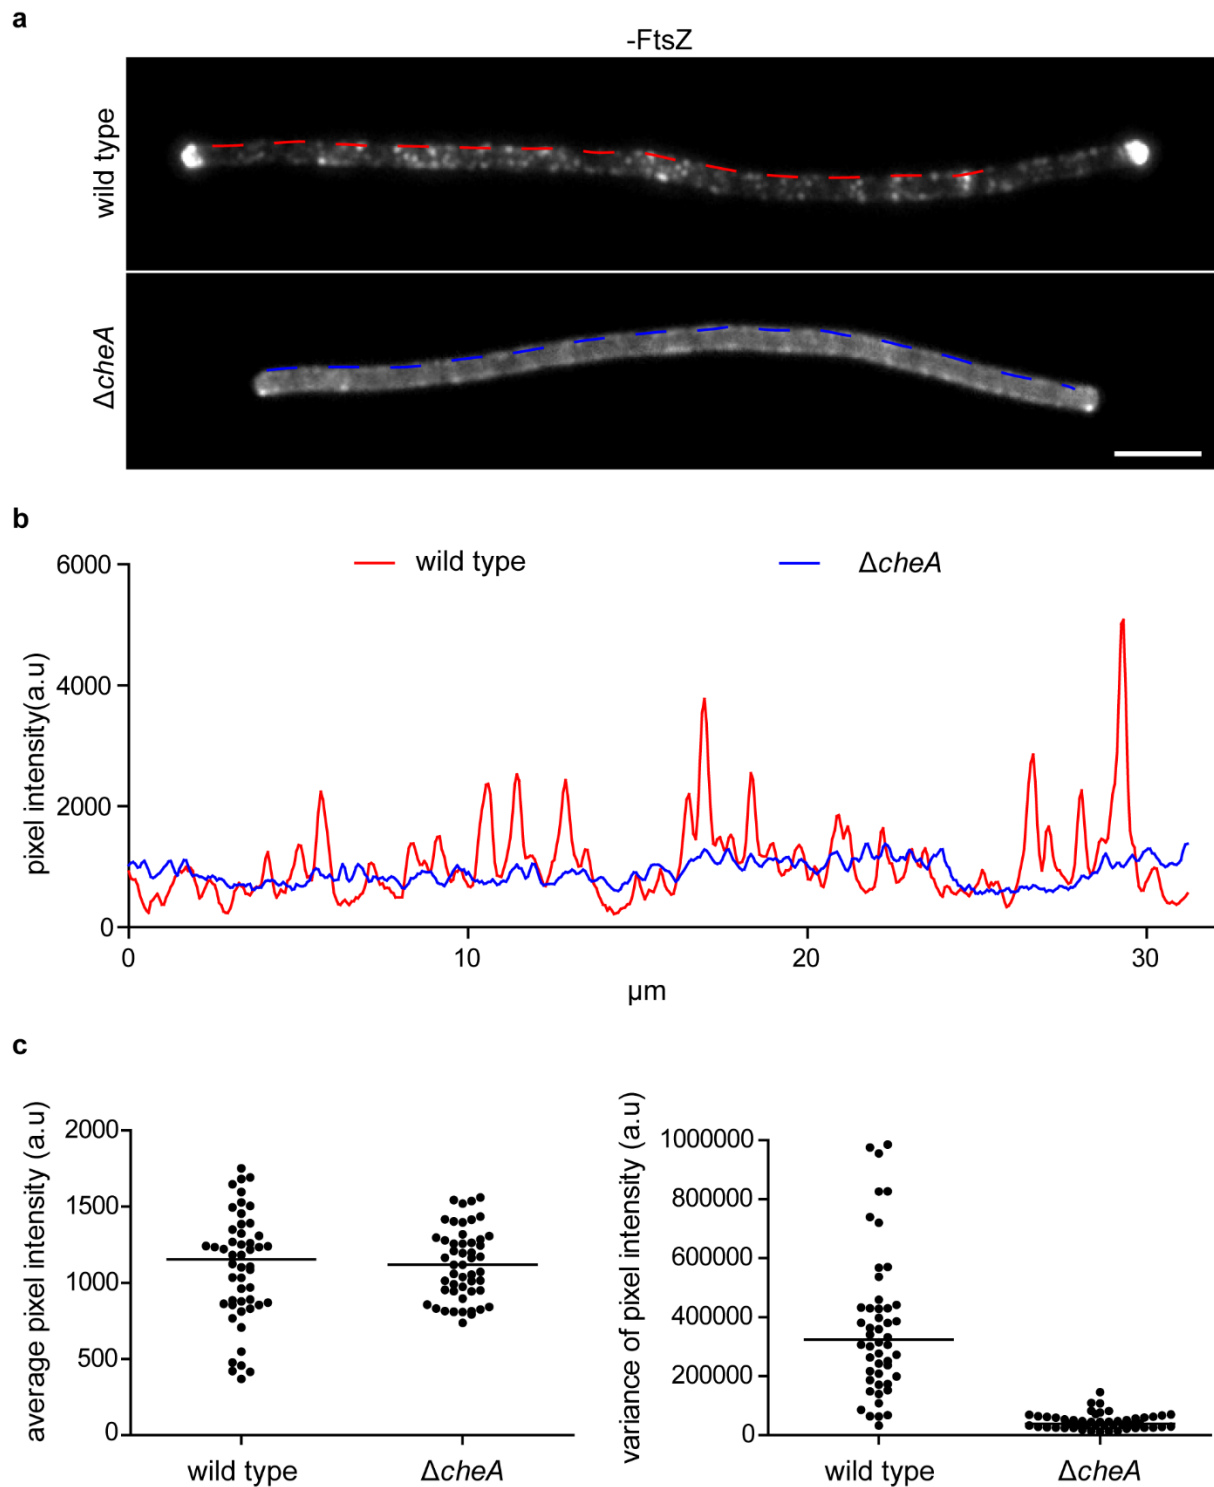

### Chemoreceptor clusters in the absence of cell division are CheA-dependent

The clustering of TlpA in non-dividing cells in the presence and absence of CheA was quantified using an intensity line scan analysis. (a) Fluorescence images of representative FtsZ-depleted cells are shown in the presence and absence of CheA. (b) A fluorescence intensity line

scan along the membrane plane (dotted line show in panel A) is depicted. Note the clear clustering of the fluorescent signal (peaks) in the presence of CheA. (c) The average and variance of fluorescence intensity of a line scan measured for 50 individual cells. The unchanged average signal indicates comparable overall fluorescent protein levels in the membrane (left panel). The clear difference in pixel intensity variance indicates a significantly altered clustering (right panel)<sup>2,3</sup>. In conclusion, the observed foci are CheA-dependent clusters rather than individual chemoreceptor trimers. Strains used: *B. subtilis* HS68 (*P<sub>xyl</sub>-tlpA-gfp*, *P<sub>spac</sub>-ftsZ*), and *B. subtilis* HS54 ( $\Delta$ *cheA P<sub>xyl</sub>-tlpA-gfp*, *P<sub>spac</sub>-ftsZ*). Scale bar, 3  $\mu$ m.



## Supplementary Figure 6

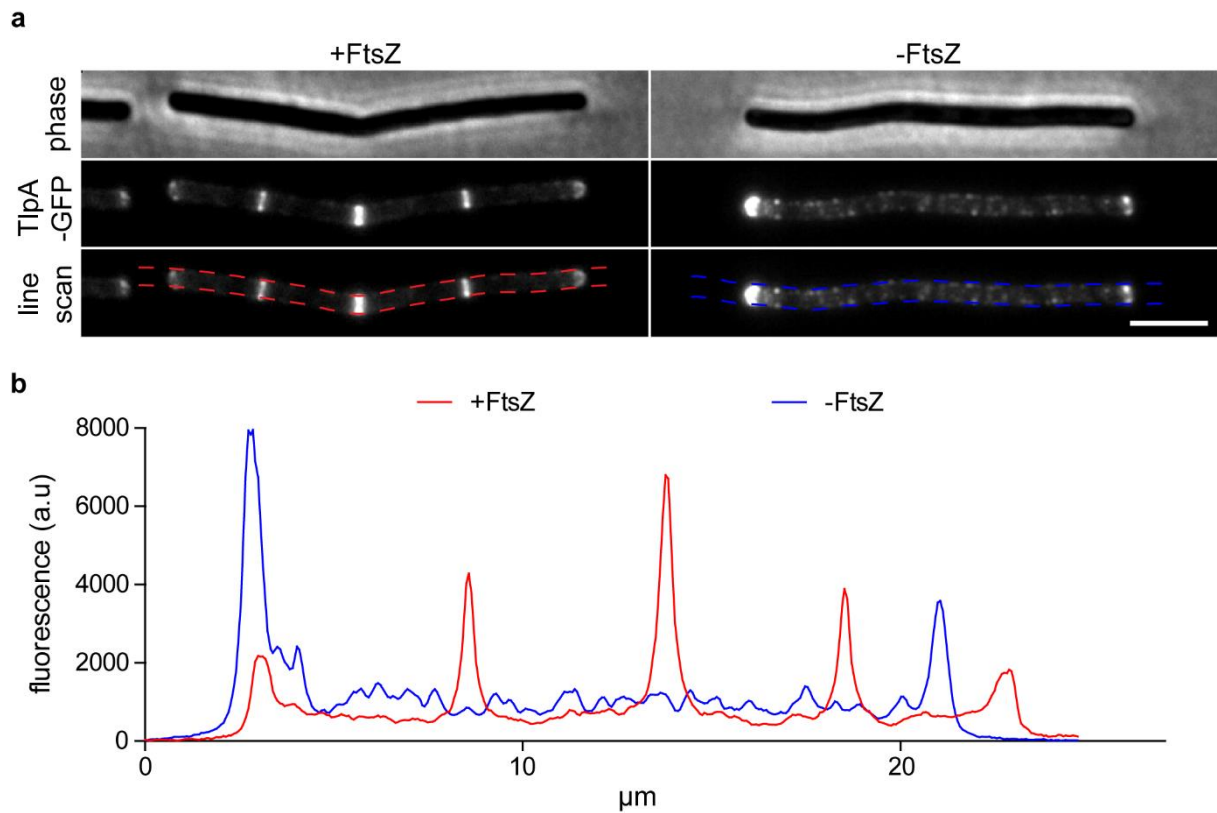

### Chemoreceptor clustering follows a periodic pattern only in dividing cells

(a) The periodic nature of chemoreceptor clustering was analysed in dividing (+FtsZ) and non-dividing (-FtsZ) cells using a line scan analysis. (b) A longitudinal fluorescence intensity profile of representative cells depicted in panel a was generated by averaging 14 pixels ( $0.9 \mu\text{m}$ ) aligned perpendicular to the cell length axis, and by measuring an intensity profile along the length axis of the cell. Note the periodic pattern of clustering in dividing cells which is absent in cells depleted for FtsZ. Strain used: *B. subtilis* HS50 ( $\Delta mcp P_{xyl}\text{-}tlpA\text{-}gfp P_{spac}\text{-}ftsZ$ ). Scale bar,  $3 \mu\text{m}$ .

## Supplementary Figure 7

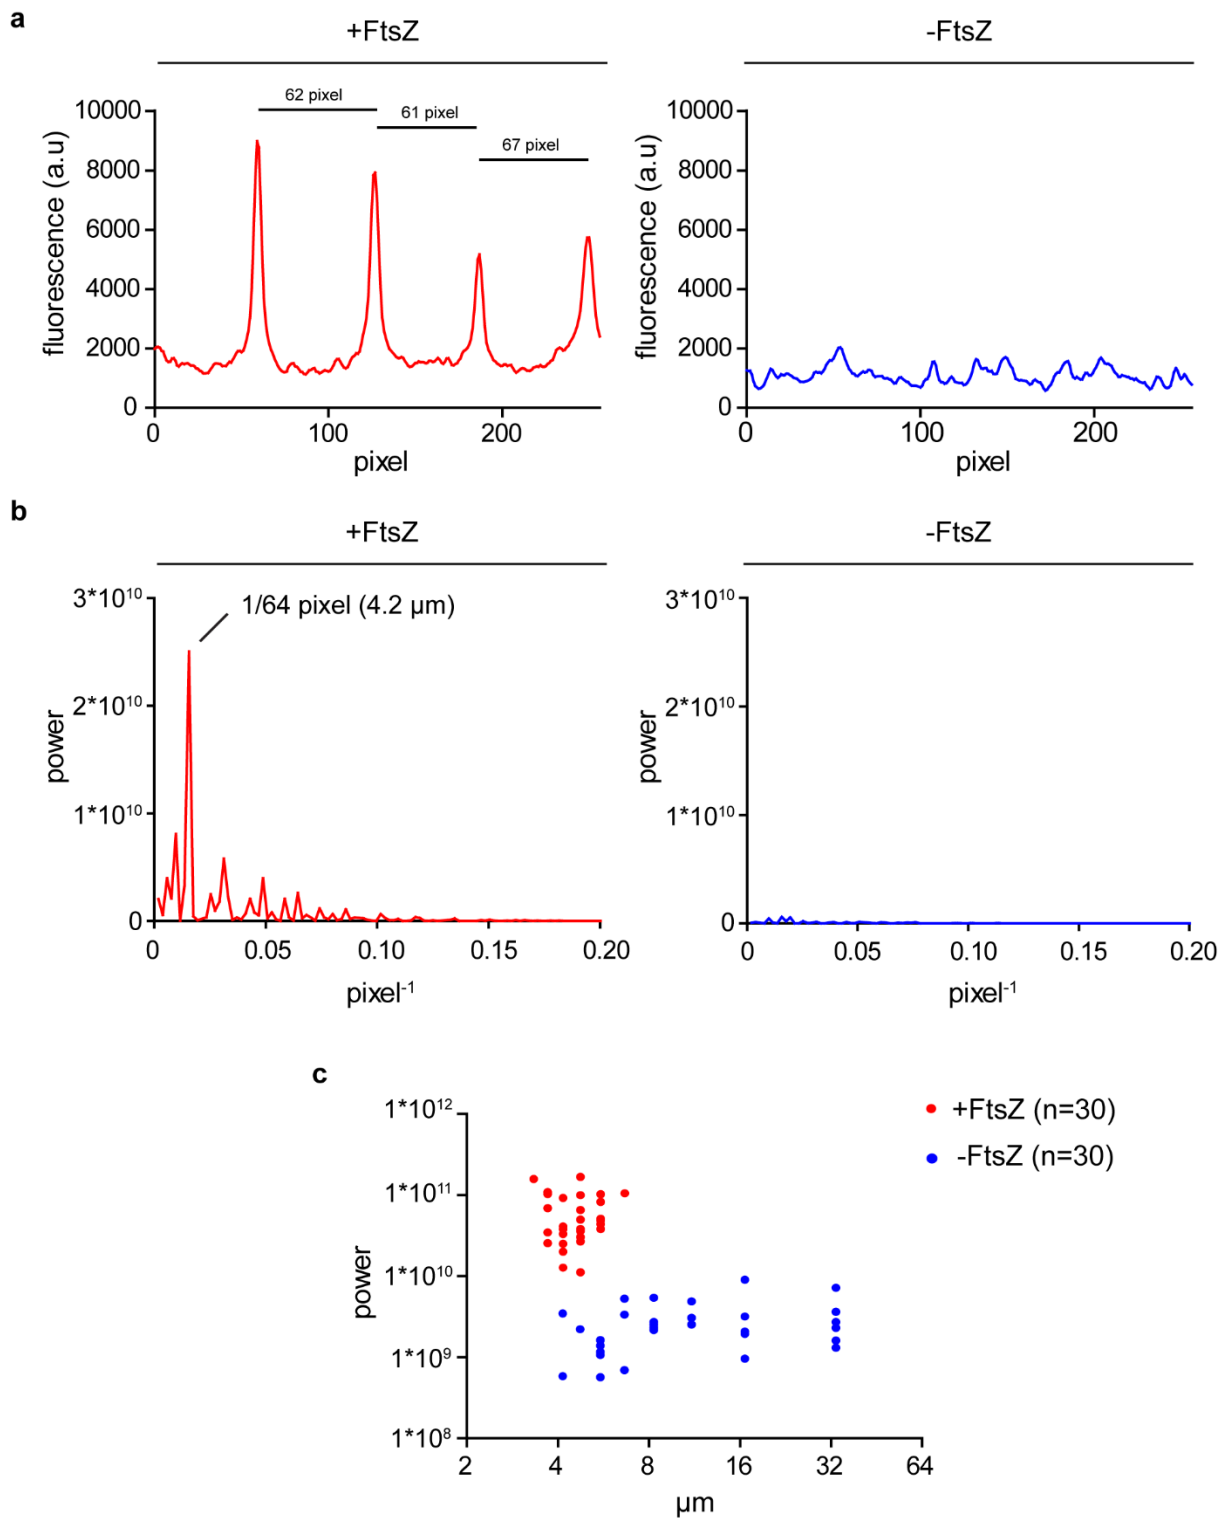

### **Fast Fourier transform analysis of periodic chemoreceptor clustering**

Fast Fourier transform (FFT) analysis is a mathematical method for detecting periodicities in a signal. FFT can be applied to identify periodic localization patterns in microscopic data<sup>4,5</sup>, and was performed here to analyse the periodicity of chemoreceptor clustering in the presence and absence of cell division. (a) Fluorescence intensity line scans of representative cells in the presence and absence of FtsZ. The measurement of intensity was essentially carried out as described in Fig. S4. In this case, the cell poles were omitted in order to specifically analyse the periodicity of non-polar clustering. (b) Fast Fourier transformed intensity profiles for the data shown in panel a are depicted as signal power (square of absolute amplitude) plotted against frequency (1 per pixel). Note the strong periodicity in dividing cells that correlates with an average cell length. In contrast, no clear periodicity is detected in non-dividing cells. (c) The analysis was repeated for 30 depleted and non-depleted cells. The power of strongest frequencies is plotted against the wavelength of the corresponding periodic pattern. Note the strong periodicities correlating with an average cell length in dividing cells. In contrast, the detected periodicities in non-dividing cells are weak, and vary strongly between individual cells. In conclusion, no significant periodic pattern is detected for chemoreceptor clustering in the absence of cell division. Strain used: *B. subtilis* HS50 ( $\Delta mcp$  *P<sub>xyl</sub>-tlpA-gfp P<sub>pac</sub>-ftsZ*).

## Supplementary Figure 8

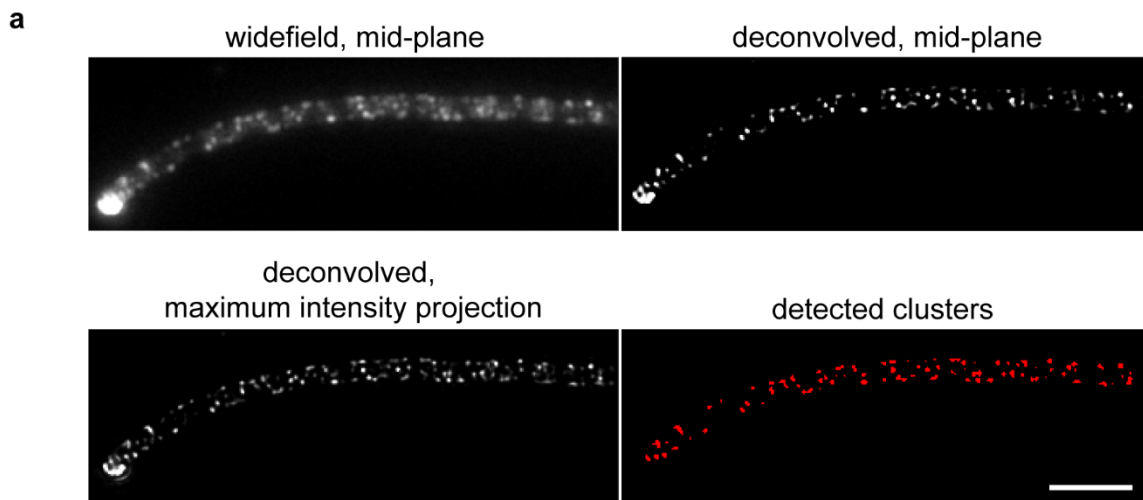

**b**

|                 | clusters | cell length ( $\mu\text{m}$ ) | clusters/ $\mu\text{m}$         | clusters/cell equivalent*        |
|-----------------|----------|-------------------------------|---------------------------------|----------------------------------|
| cell 1          | 231      | 50.3                          | 4.6                             | 23                               |
| cell 2          | 216      | 54.0                          | 4.0                             | 20                               |
| cell 3          | 267      | 53.3                          | 5.0                             | 25                               |
| cell 4          | 329      | 68.6                          | 4.8                             | 24                               |
| cell 5          | 140      | 35.8                          | 3.9                             | 19.5                             |
| cell 6          | 97       | 23.3                          | 4.2                             | 21                               |
| cell 7          | 254      | 49.4                          | 5.1                             | 25.5                             |
| cell 8          | 237      | 54.9                          | 4.3                             | 21.5                             |
| mean $\pm$ s.d. |          |                               | <b>4.5 <math>\pm</math> 0.5</b> | <b>22.4 <math>\pm</math> 2.3</b> |

\*calculated with the average cell length of *B. subtilis* wild type under comparable growth conditions

### Chemoreceptor clustering in the absence of cell division

The density of small chemoreceptor clusters upon FtsZ-depletion was quantified from optical sections. To identify individual clusters from different focal planes, the z-stacks were deconvolved followed by a maximum intensity projection. The individual clusters were detected and quantified from the maximum intensity projections using ImageJ. (a) A representative cell at different stages of the image analysis is depicted. (b) The mean cluster density is calculated as clusters per  $\mu\text{m}$  of cylindrical cell section, and per cell length equivalent of a dividing cell (5  $\mu\text{m}$ ). Strain used: *B. subtilis* HS50 ( $\Delta mcp P_{xyl}\text{-}tlpA\text{-}gfp P_{spac}\text{-}ftsZ$ ). Scale bar, 3  $\mu\text{m}$ .

## Supplementary Figure 9

$$r-l = r-p$$

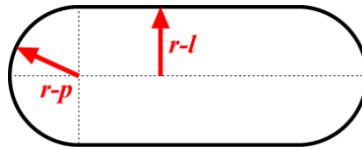

### **Schematic representation of the sphero-cylindrical geometry of a rod shaped bacterial cell**

The radii of the cell pole ( $r-p$ ) and the lateral part of the cell ( $r-l$ ) are comparable and only differ in dimensionality (2-dimensional curvature at the cell pole, 1-dimensional curvature at the lateral part of the cell).

## Supplementary Figure 10

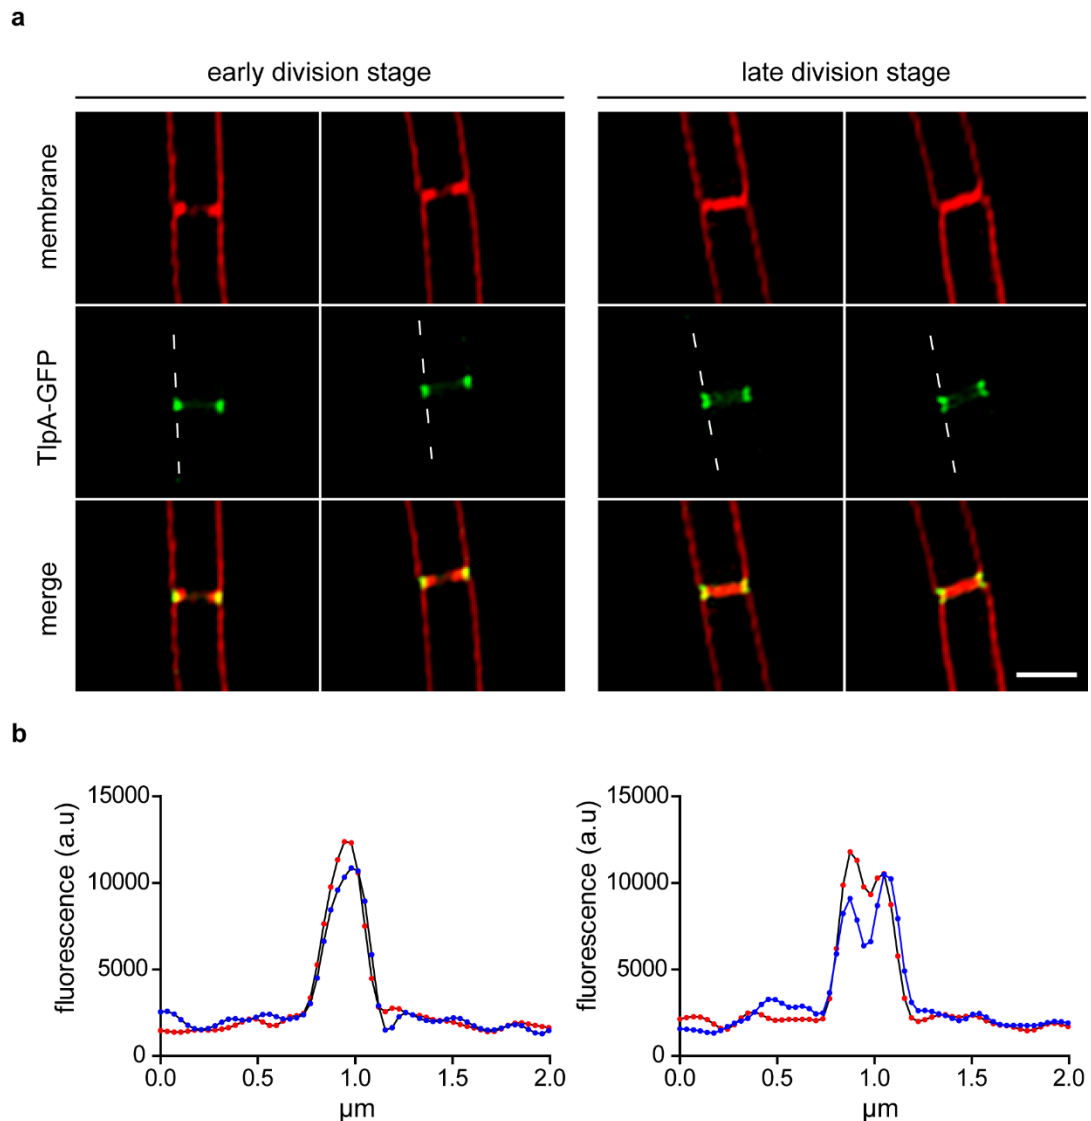

### Septal localization of TlpA during early and later cell division stages

(a) Structured illumination microscopy (SIM) of TlpA-GFP and fluorescent membrane stain (Nile Red) is depicted in early, and late stages of cell division. Note the appearance of two septal TlpA-rings upon maturation of the cell division. (b) Fluorescent intensity line scans of the TlpG-GFP images depicted in panel a (the red and blue lines represent the two line scans for each condition shown in panel a). The point-spread function of TlpA in early dividing cells resolves into two individual peaks in later stage of the division. In conclusion, TlpA localizes symmetrically on both sides of the developing cell division plane (septum). Strain used: *B. subtilis* HS49 ( $\Delta mcp P_{xyl}\text{-}tlpA\text{-}gfp$ ). Scale bar, 1  $\mu\text{m}$ .

## Supplementary Figure 11

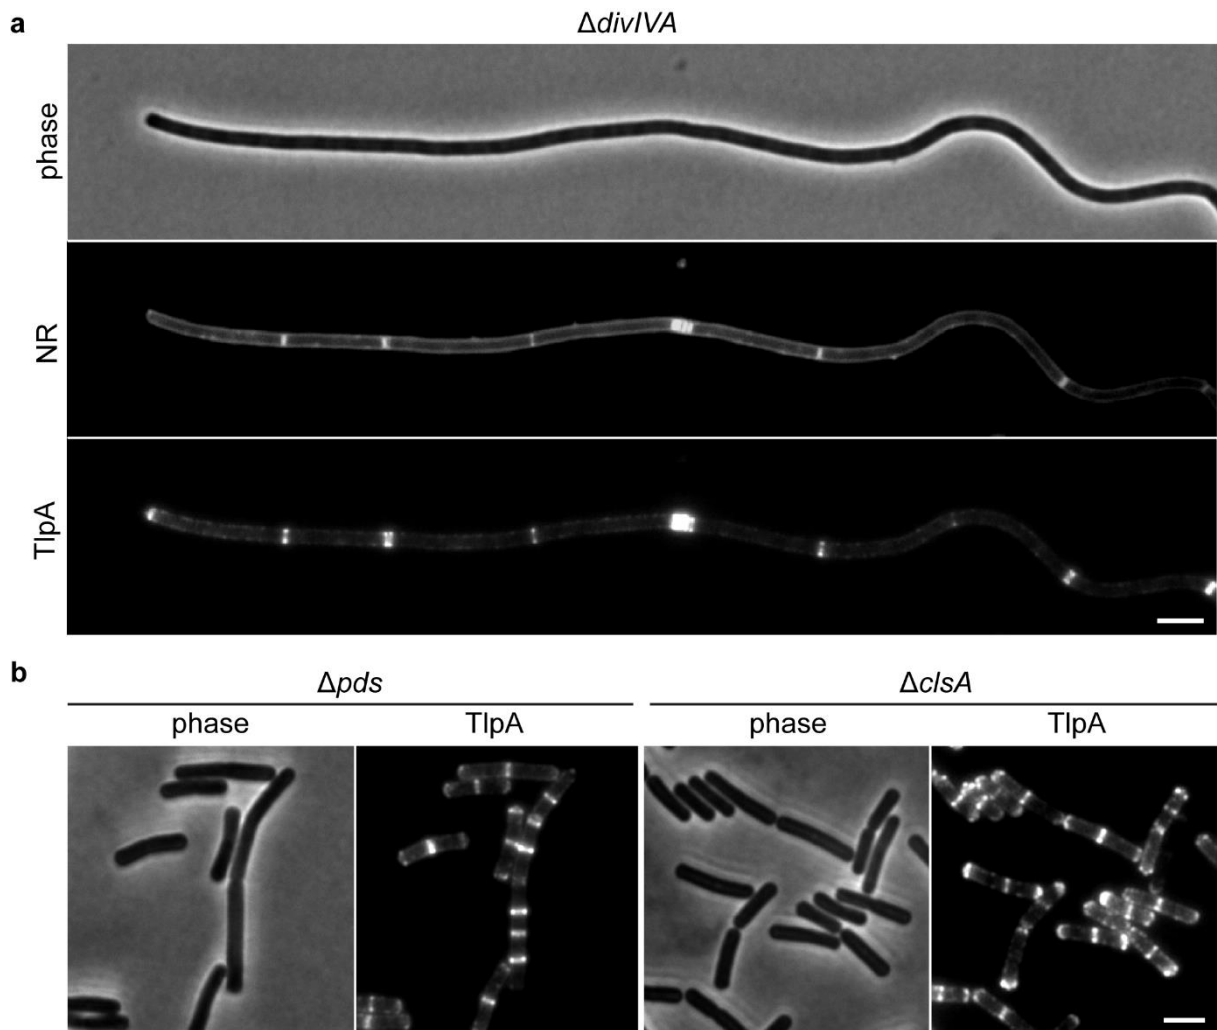

### TlpA localization is independent of DivIVA, phosphatidylethanolamine and cardiolipin

(a) Phase contrast image of  $\Delta divIVA$  *B. subtilis* cells (upper panel) expressing TlpA-GFP (lower panel), and fluorescent Nile Red membrane stains (middle panel). This is a wide field microscopy example of cells shown in Fig. 3c. (b) Phase contrast image of *B. subtilis* cells (left panels) expressing TlpA-GFP (right panels) in cells that do not synthesize phosphatidylethanolamine ( $\Delta pds$ ) or cardiolipin ( $\Delta clsA$ ). Strains used: *B. subtilis* HS52 ( $\Delta mcp \Delta divIVA P_{xyl}-tlpA-gfp$ ), *B. subtilis* HS61 ( $\Delta pds P_{xyl}-tlpA-gfp$ ), and *B. subtilis* HS62 ( $\Delta clsA P_{xyl}-tlpA-gfp$ ). Scale bar, 3  $\mu$ m.

**Supplementary Table 1: Strains and Plasmids**

| Strain                    | Genotype/Properties                                                                                                   | Induction     |      | Source                  |
|---------------------------|-----------------------------------------------------------------------------------------------------------------------|---------------|------|-------------------------|
| <i>B. subtilis</i> 168    | <i>trpC2</i> wild type                                                                                                | -             |      | 6                       |
| <i>B. subtilis</i> HS48   | <i>amyE::spc pxyl-tpa-mgfp</i>                                                                                        | 0.3%          | xyl  | this work               |
| <i>B. subtilis</i> OI3545 | $\Delta 10mcp$ <i>ery cat</i>                                                                                         | -             |      | 7                       |
| <i>B. subtilis</i> OI1840 | <i>cheA::cat</i>                                                                                                      | -             |      | 8                       |
| <i>B. subtilis</i> OI3061 | <i>cheW::cat cheV::kan</i>                                                                                            | -             |      | 9                       |
| <i>B. subtilis</i> 1801   | <i>Pspac-ftsZ ble</i>                                                                                                 | 0-100 $\mu$ M | IPTG | 10                      |
| <i>B. subtilis</i> 799    | <i>ftsL::Pspac-pbpB kan</i>                                                                                           | 0-1 mM        | IPTG | 11                      |
| <i>B. subtilis</i> HB5362 | <i>clsA::cat</i>                                                                                                      | -             |      | 12                      |
| <i>B. subtilis</i> HB5343 | <i>pds::ery</i>                                                                                                       | -             |      | 12                      |
| <i>B. subtilis</i> 4041   | <i>divIVA::tet</i>                                                                                                    | -             |      | 13                      |
| <i>B. subtilis</i> M96    | <i>spoVD::cat Pxyl-murE</i>                                                                                           | 0-1%          | xyl  | 14                      |
| <i>B. subtilis</i> HS49   | $\Delta 10mcp$ <i>ery cat amyE::spc pxyl-tpA-mgfp</i>                                                                 | 0.3 %         | xyl  | this work               |
| <i>B. subtilis</i> HS50   | $\Delta 10mcp$ <i>ery cat amyE::spc pxyl-tpA-mgfp</i><br><i>Pspac-ftsZ ble</i>                                        | 0.3 %         | xyl  | this work               |
| <i>B. subtilis</i> HS51   | $\Delta 10mcp$ <i>ery cat amyE::spc pxyl-tpA-mgfp</i><br><i>ftsL::Pspac-pbpB kan</i>                                  | 0.3 %         | xyl  | this work               |
| <i>B. subtilis</i> HS52   | $\Delta 10mcp$ <i>ery cat amyE::spc pxyl-tpA-mgfp</i><br><i>divIVA::tet</i>                                           | 0.3 %         | xyl  | this work               |
| <i>B. subtilis</i> HS53   | <i>cheA::cat amyE::spc pxyl-tpA-mgfp</i>                                                                              | 0.3%          | xyl  | this work               |
| <i>B. subtilis</i> HS54   | <i>cheA::cat amyE::spc pxyl-tpA-mgfp</i><br><i>Pspac-ftsZ ble</i>                                                     | 0.3%          | xyl  | this work               |
| <i>B. subtilis</i> HS55   | <i>spoVD::cat Pxyl-murE sup</i><br><i>amyE::spc pxyl-tpA-mgfp</i>                                                     | 0-1%          | xyl  | this work               |
| <i>B. subtilis</i> HS56   | $\Delta 10mcp$ <i>ery cat</i><br><i>amyE::spc pxyl-tpA(N<sub>496</sub>R)-mgfp</i>                                     | 0.3%          | xyl  | this work               |
| <i>B. subtilis</i> HS57   | $\Delta 10mcp$ <i>ery cat</i><br><i>amyE::spc pxyl-tpA(V<sub>338</sub>G, L<sub>339</sub>G)-mgfp</i>                   | 0.3 %         | xyl  | this work               |
| <i>B. subtilis</i> HS58   | $\Delta 10mcp$ <i>ery cat</i><br><i>amyE::spc pxyl-tpA(K<sub>474</sub>C)-mgfp</i>                                     | 0.3%          | xyl  | this work               |
| <i>B. subtilis</i> HS59   | $\Delta 10mcp$ <i>ery cat</i><br><i>amyE::spc pxyl-tpA(K<sub>474</sub>C, N<sub>496</sub>R)-mgfp</i>                   | 0.3%          | xyl  | this work               |
| <i>B. subtilis</i> HS60   | $\Delta 10mcp$ <i>ery cat</i><br><i>amyE::spc pxyl-tpA(K<sub>474</sub>C, V<sub>338</sub>G, L<sub>339</sub>G)-mgfp</i> | 0.3 %         | xyl  | this work               |
| <i>B. subtilis</i> HS61   | <i>pds::ery amyE::spc pxyl-tpA-mgfp</i>                                                                               | 0.3 %         | xyl  | this work               |
| <i>B. subtilis</i> HS62   | <i>clsA::cat amyE::spc pxyl-tpA-mgfp</i>                                                                              | 0.3 %         | xyl  | this work               |
| <i>B. subtilis</i> HS63   | <i>cheW::cat cheV::kan amyE::spc pxyl-tpA-mgfp</i>                                                                    | 0.3 %         | xyl  | this work               |
| <i>B. subtilis</i> HS64   | <i>cheW::cat cheV::kan amyE::spc pxyl-tpA-mgfp</i><br><i>Pspac-ftsZ ble</i>                                           | 0.3 %         | xyl  | this work               |
| <i>B. subtilis</i> HS65   | <i>aprE::kan Pspac-mcherry-cheA</i>                                                                                   | 1 mM          | IPTG | this work               |
| <i>B. subtilis</i> HS66   | $\Delta 10mcp$ <i>ery cat aprE::kan Pspac-mcherry-cheA</i>                                                            | 1 mM          | IPTG | this work               |
| <i>B. subtilis</i> HS67   | $\Delta 10mcp$ <i>ery cat aprE::kan Pspac-mcherry-cheA</i><br><i>amyE::spc pxyl-tpA-mgfp</i>                          | 0.3 %         | xyl  | this work               |
| <i>B. subtilis</i> HS68   | <i>amyE::spc pxyl-tpA-mgfp</i><br><i>Pspac-ftsZ ble</i>                                                               | 1 mM          | IPTG |                         |
|                           |                                                                                                                       | 0.3 %         | xyl  |                         |
|                           |                                                                                                                       | 0-100 $\mu$ M | IPTG |                         |
| Plasmids                  | Genotype/Properties                                                                                                   | Induction     |      | Source                  |
| pSG1154                   | <i>bla amyE3' spc Pxyl gfpmut1 amyE5'</i>                                                                             | -             |      | 15                      |
| pHJS102                   | <i>bla amyE3' spc Pxyl gfp(A<sub>206</sub>K) amyE5'</i>                                                               | -             |      | this work               |
| pAPNC-kan                 | <i>bla aprE3' kan Pspac aprE5'</i>                                                                                    |               |      | De Olmedo Verd, unpubl. |



## Supplementary Table 2: Oligonucleotides

| Oligonucleotide                               | Sequence                                            |
|-----------------------------------------------|-----------------------------------------------------|
| GFP(A <sub>206</sub> K)-for                   | CCTGTCCACACAATCTAAACTTTCGAAAGATCCC                  |
| GFP(A <sub>206</sub> K)-rev                   | GGGATCTTTCGAAAGTTTAGATTGTGTGGACAGG                  |
| TlpA-for                                      | GAGATTCCTAGGATGAAAAAAACACTCACCCTATTC                |
| TlpA-rev                                      | TTCTCCTTTACTCATTTTTGTCTACTTTAAATTGTTTTGTCAG         |
| pSG1154-for                                   | ATGAGTAAAGGAGAAGAACTTTTCAC                          |
| pSG1154-rev                                   | CATCCTAGGAATCTCCTTTCTAG                             |
| TlpAK <sub>474</sub> C-for                    | GTGAAAGGGCTGGAGATCAAATCATGCGATATCACGAATATTTTG       |
| TlpAK <sub>474</sub> C-rev                    | CAAAATATTCGTGATATCGCATGATTTGATCTCCAGCCCTTTCAC       |
| TlpAN <sub>496</sub> R-for                    | CCAATCTTTTGGCTTTACGTGCCGCCATTGAAGCTGCCAG            |
| TlpAN <sub>496</sub> R-rev                    | CTGGCAGCTTCAATGGCGGCACGTAAAGCCAAAAGATTGG            |
| TlpAV <sub>338</sub> G L <sub>339</sub> G-for | GAACTCGGCGGTGGAAGTGAGAGCTTCAATCATATG                |
| TlpAV <sub>338</sub> G L <sub>339</sub> G-rev | CATATGATTGAAGCTCTCACTTCCACCGCCGAGTTC                |
| mCherry-for ( <i>Sall</i> )                   | GCGCGGTTCGACACATAAGGAGGAACTACTATGGTC                |
| mCherry-rev ( <i>Bam</i> HI)                  | GCGCGGGATCCTGAGCCGCTTCCTGATTTGTATAAATTCGTCCATTCCACC |
| CheA-for ( <i>Bam</i> HI)                     | GCGCGGGATCCATGGATATGAATCAGTATTTAGATG                |
| CheA-rev ( <i>Eco</i> RI)                     | GCGCGGAATTCCTTAAATAATCAGTGCATTACAATCAATAATG         |

## SUPPLEMENTARY REFERENCES

- 1 Stokes, N. R. *et al.* An improved small-molecule inhibitor of FtsZ with superior *in vitro* potency, drug-like properties, and *in vivo* efficacy. *Antimicrob. Agents Chemother.* **57**, 317-325 (2013).
- 2 Strahl, H., Bürmann, F. & Hamoen, L. W. The actin homologue MreB organizes the bacterial cell membrane. *Nat. Commun.* **5**, 3442 (2014).
- 3 Strahl, H. *et al.* Membrane recognition and dynamics of the RNA degradosome. *PLoS Genet.* **11**, e1004961 (2015).
- 4 Cameron, T. A., Roper, M. & Zambryski, P. C. Quantitative image analysis and modeling indicate the *Agrobacterium tumefaciens* type IV secretion system is organized in a periodic pattern of foci. *PLoS ONE* **7**, e42219 (2012).
- 5 Zhong, G. *et al.* Developmental mechanism of the periodic membrane skeleton in axons. *Elife* **3**, doi: 10.7554/eLife.04581 (2014).
- 6 Barbe, V. *et al.* From a consortium sequence to a unified sequence: The *Bacillus subtilis* 168 reference genome a decade later. *Microbiology* **155**, 1758-1775 (2009).
- 7 Hou, S. *et al.* Myoglobin-like aerotaxis transducers in archaea and bacteria. *Nature* **403**, 540-544 (2000).
- 8 Fuhrer, D. K. & Ordal, G. W. *Bacillus subtilis* CheN, a homolog of CheA, the central regulator of chemotaxis in *Escherichia coli*. *J. Bacteriol.* **173**, 7443-7448 (1991).
- 9 Karatan, E., Saulmon, M. M., Bunn, M. W. & Ordal, G. W. Phosphorylation of the response regulator CheV is required for adaptation to attractants during *Bacillus subtilis* chemotaxis. *J. Biol. Chem.* **276**, 43618-43626 (2001).
- 10 Beall, B. & Lutkenhaus, J. FtsZ in *Bacillus subtilis* is required for vegetative septation and for asymmetric septation during sporulation. *Genes Dev.* **5**, 447-455 (1991).
- 11 Daniel, R. A., Williams, A. M. & Errington, J. A complex four-gene operon containing essential cell division gene *pbpB* in *Bacillus subtilis*. *J. Bacteriol.* **178**, 2343-2350 (1996).
- 12 Salzberg, L. I. & Helmann, J. D. Phenotypic and transcriptomic characterization of *Bacillus subtilis* mutants with grossly altered membrane composition. *J. Bacteriol.* **190**, 7797-7807 (2008).
- 13 van Baarle, S. *et al.* Protein-protein interaction domains of *Bacillus subtilis* DivIVA. *J. Bacteriol.* **195**, 1012-1021 (2013).
- 14 Leaver, M., Dominguez-Cuevas, P., Coxhead, J. M., Daniel, R. A. & Errington, J. Life without a wall or division machine in *Bacillus subtilis*. *Nature* **460**, 538-538 (2009).
- 15 Lewis, P. J. & Marston, A. L. GFP vectors for controlled expression and dual labelling of protein fusions in *Bacillus subtilis*. *Gene* **227**, 101-110 (1999).
